# Supplementary material for: Abnormal Salivary Total and Oligomeric Alpha-Synuclein in Parkinson’s Disease
Source: PubMed Central journal article supplement (PMC4807094; doi:10.1371/journal.pone.0151156), 2016-03-24
Supplement: pone.0151156.s002.pdf [file pone.0151156.s002.pdf]

Human alpha-Synuclein Oligomer ELISA  
Sandwich Elisa

Raw data

|   |       |       |       |       |       |       |
|---|-------|-------|-------|-------|-------|-------|
| A | 0.069 | 0.058 | ----- | ----- | ----- | ----- |
| B | 0.105 | 0.125 | ----- | ----- | ----- | ----- |
| C | 0.233 | 0.17  | ----- | ----- | ----- | ----- |
| D | 0.53  | 0.13  | ----- | ----- | ----- | ----- |
| E | 0.91  |       | ----- | ----- | ----- | ----- |
| F | 1.457 |       | ----- | ----- | ----- | ----- |
| G | 2.038 |       | ----- | ----- | ----- | ----- |
| H | 0.073 |       | ----- | ----- | ----- | ----- |

Elisa Distribution

|   |       |       |       |       |       |       |
|---|-------|-------|-------|-------|-------|-------|
| A | blank | blank | ----- | ----- | ----- | ----- |
| B | 0     | sp11  | ----- | ----- | ----- | ----- |
| C | 100   | sp12  | ----- | ----- | ----- | ----- |
| D | 250   | sp13  | ----- | ----- | ----- | ----- |
| E | 500   | ----- | ----- | ----- | ----- | ----- |
| F | 1000  | ----- | ----- | ----- | ----- | ----- |
| G | 2500  | ----- | ----- | ----- | ----- | ----- |
| H | blank | ----- | ----- | ----- | ----- | ----- |

Data processing

Four parameter logistic curve regression

Formula:  $y = (A - D) / [1 + (x/C)^B] + D$

|   | Con pg/ml | OD    |
|---|-----------|-------|
| A | 0         | 0.105 |
| B | 100       | 0.233 |
| C | 250       | 0.53  |
| D | 500       | 0.91  |
| E | 1000      | 1.457 |
| F | 2500      | 2.038 |

A = 2.47587  
B = -1.32296  
C = 811.41181  
D = 0.10247  
r<sup>2</sup> = 0.99983

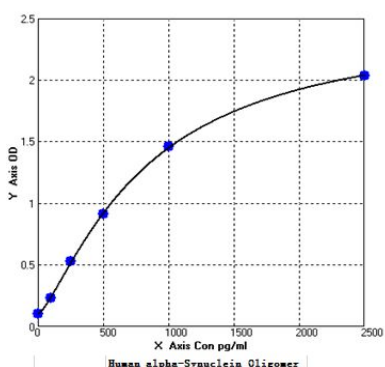

| alpha synuclein | con pg/ml | %                     |
|-----------------|-----------|-----------------------|
| 1               | 0.125     | 0.00967489   0.967489 |

|   |      |             |           |
|---|------|-------------|-----------|
| 2 | 0.17 | 0.022506257 | 2.2506257 |
| 3 | 0.13 | 0.011275324 | 1.1275324 |

The antibody is a monoclonal antibody produced by immunizing the mouse with the synthetic peptides. Standards are recombinant protein expressed in E coli. This kit cannot distinguish the different types of alpha synuclein oligomers).

Engineer *Menan*.
